# Supplementary material for: Aqueous synthesis of color tunable Cu doped Zn–In–S/ZnS nanoparticles in the whole visible region for cellular imaging
Source: Royal Society of Chemistry journal article supplement (doi:10.1039/c4tb01957a), 2015-01-01
Supplement: c4tb01957a1.pdf [file c4tb01957a1.pdf]

# Aqueous synthesis of color tunable Cu doped Zn-In-S/ZnS nanoparticles in the whole visible region for cellular imaging

Tongtong Jiang,<sup>a</sup> Jiangluqi Song,<sup>a</sup> Huijie Wang,<sup>a</sup> Xuecheng Ye,<sup>a</sup> Hao Wang,<sup>a</sup> Wenting Zhang,<sup>a</sup> Mingya Yang,<sup>b</sup> Ruixiang Xia,<sup>\*b</sup> Lixin Zhu,<sup>\*b</sup> Xiaoliang Xu<sup>\*a</sup>

<sup>a</sup> Key Laboratory of Strongly-Coupled Quantum Matter Physics, Chinese Academy of Sciences, School of Physical Sciences, University of Science and Technology of China, No. 96 Jinzhai Road, Hefei, Anhui Province, 230026, P. R. China.

<sup>b</sup> Center Laboratory, First Affiliated Hospital of Anhui Medical University, Hefei, Anhui Province, P. R. China.

| Constant                                       | Cu:(In+Zn)         | In:Zn, In+Zn                | Cu:Zn, Cu+Zn       |                   |                   | Cu:In, Cu+In                 |                             |
|------------------------------------------------|--------------------|-----------------------------|--------------------|-------------------|-------------------|------------------------------|-----------------------------|
| variable                                       | In:Zn              | Cu:(In+Zn)                  | In:(Cu+Zn)         |                   |                   | Zn:(Cu+In)                   |                             |
| Cu/In/Zn precursor, corresponding main PL peak | 1:5:15,<br>463 nm  | 1:30:10,<br>552 nm          | 1:30:10,<br>552 nm | 2:30:3,<br>639 nm | 2:40:5,<br>608 nm | 1:10:10 (2:20:20),<br>578 nm | 1:15:5 (2:30:10),<br>591 nm |
|                                                | 1:10:10,<br>578 nm | 1:15:5 (2:30:10),<br>591 nm | 1:10:10,<br>578 nm | 2:20:3,<br>668 nm | 2:15:5,<br>678 nm | 2:20:3,<br>668 nm            | 2:30:3,<br>639 nm           |
|                                                | 1:15:5,<br>591 nm  | 2:15:5 (4:30:10),<br>678 nm |                    |                   |                   |                              |                             |

Table S1. The main PL peak position corresponding to different ratios of Cu/In/Zn.

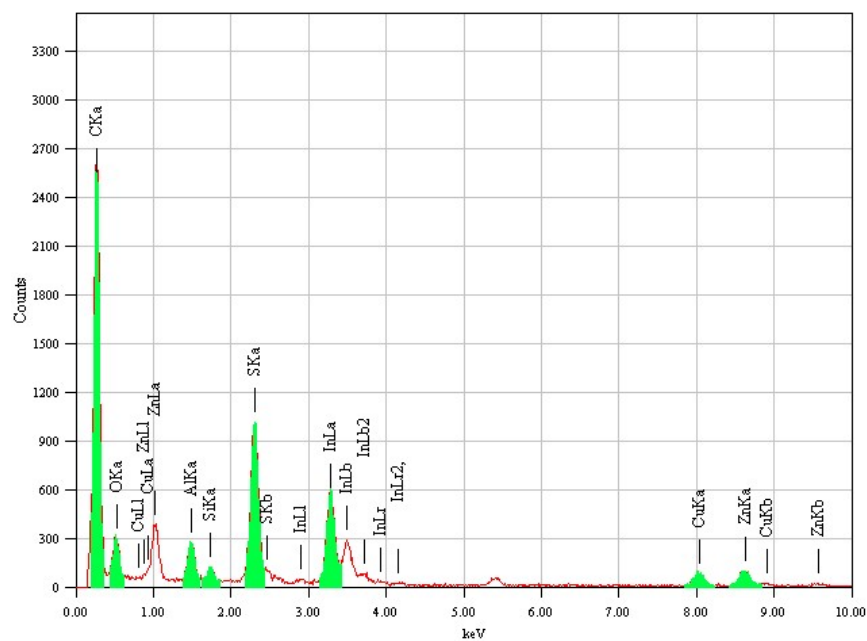

Figure S1. Energy dispersive spectroscopy (EDS) image of CZIS QDs

| QDs             | Cu    | Zn     | In     | S      |
|-----------------|-------|--------|--------|--------|
| <b>CZIS</b>     | 3.187 | 4.183  | 38.313 | 54.316 |
| <b>CZIS/ZnS</b> | 2.298 | 34.699 | 13.320 | 49.684 |

Table S2. Element ratios of CZIS and CZIS/ZnS QDs estimated by XPS

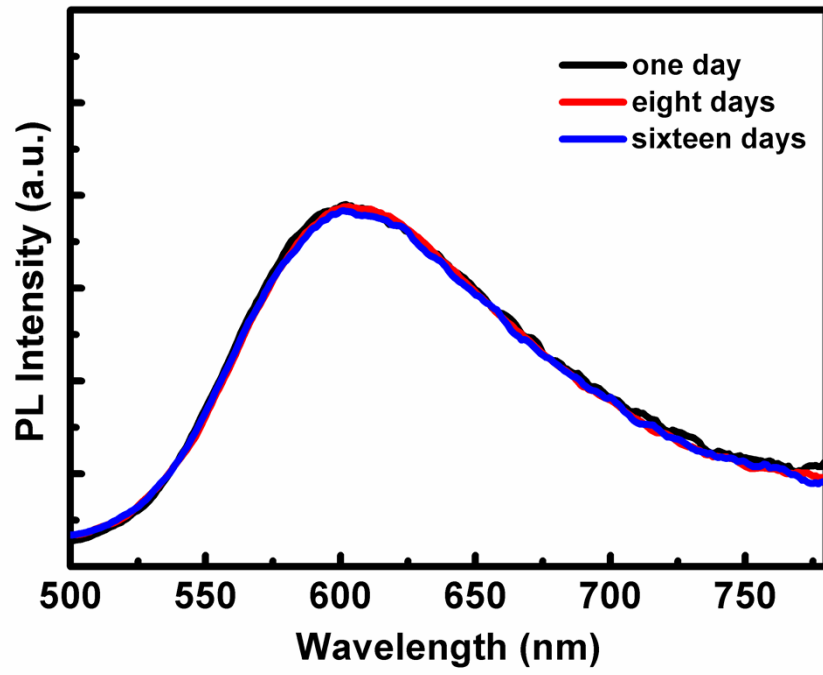

Figure S2. The PL spectra of CZIS/ZnS QDs measured after being stored for different times.
